# Supplementary material for: Burden of Diagnosed Diabetes among People With and Without HIV in Uganda: a Cross-Sectional Analysis of the Rakai Community Cohort Study
Source: Research Square preprint supplement (doi:10.21203/rs.3.rs-9795150/v1), 2026-06-28
Supplement: Supplementary file 1 [file c15a611460118d189d8f48ea.docx]

**Supplement Table 1. Demographic and Socioeconomic Characteristics Distribution between Excluded and Included Participants.**

|  | **Eligible but Excluded** | **Eligible and Included** | **P-value** |
| --- | --- | --- | --- |
|  | **N=9914** | **N=17,716** |  |
| **Sex** |  |  |  |
| Female | 4410 (44.5%) | 9512 (53.7%) | <0.001 |
| Male | 5504 (55.5%) | 8204 (46.3%) |  |
| **Community type** |  |  |  |
| Inland | 7448 (75.1%) | 13174 (74.4%) | 0.16 |
| Fishing | 2466 (24.9%) | 4542 (25.6%) |  |
| **Age (years)** |  |  |  |
| 15-34 | 7063 (71.2%) | 10199 (57.6%) | <0.001 |
| 35-44 | 1568 (15.8%) | 4267 (24.1%) |  |
| 45-54 | 678 (6.8%) | 2399 (13.5%) |  |
| 55+ | 605 (6.1%) | 851 (4.8%) |  |

Notes: The RCCS included a total of 17,789 participants from more than 12 districts in the Greater Masaka Region. After excluding 73 individuals with missing lab_verified HIV serostatus and/or diagnosed diabetes status data, the final analytical dataset comprised 17,716 participants. Weighted analysis based on age, sex, and community type was performed to adjust for sampling biases.

**Supplement Table 2. Weighted and Unweighted Prevalence of Diagnosed Diabetes and HIV Serostatus by Age , Community type, and Sex.**

| **Age group** | **Stratum** | **Weighted Prevalence** | | **Unweighted Prevalence** | |
| --- | --- | --- | --- | --- | --- |
| **HIV** | **Diabetes** | **HIV** | **Diabetes** |
| **15-34** | **Overall** | 10.57 (10.00, 11.17) | 0.20 (0.13, 0.30) | 10.99 (10.40, 11.61) | 0.21 (0.13, 0.31) |
| **Inland** | **6.15 (5.64, 6.71)** | **0.11 (0.06, 0.22)** | 6.41 (5.89, 6.99) | 0.12 (0.06, 0.22) |
| **Fishing** | **23.90 (22.30, 25.58)** | **0.44 (0.25, 0.78)** | 24.65 (23.02, 26.36) | 0.47 (0.27, 0.82) |
| **Female** | **15.04 (14.12, 16.01)** | 0.31 (0.19, 0.50) | 15.10 (14.17, 16.07) | 0.31 (0.19, 0.50) |
| **Male** | **6.24 (5.59, 6.96)** | 0.08 (0.03, 0.22) | 6.28 (5.62, 7.00) | 0.08 (0.03, 0.22) |
| **35-44** | **Overall** | 29.81 (28.46, 31.20) | 1.02 (0.76, 1.36) | 30.00 (28.64, 31.39) | 1.03 (0.77, 1.38) |
| **Inland** | **20.57 (19.14, 22.08)** | 1.00 (0.69, 1.43) | 20.78 (19.34, 22.30) | 1.01 (0.70, 1.44) |
| **Fishing** | **48.89 (46.26, 51.52)** | 1.06 (0.64, 1.74) | 49.17 (46.54, 51.80) | 1.08 (0.66, 1.78) |
| **Female** | **32.02 (30.16, 33.95)** | 1.29 (0.91, 1.84) | 32.07 (30.20, 34.00) | 1.29 (0.91, 1.84) |
| **Male** | **27.44 (25.51, 29.47)** | 0.72 (0.43, 1.21) | 27.52 (25.58, 29.55) | 0.72 (0.43, 1.21) |
| **45-54** | **Overall** | 27.80 (26.04, 29.62) | 2.55 (1.99, 3.27) | 27.97 (26.21, 29.80) | 2.54 (1.98, 3.25) |
| **Inland** | **21.37 (19.57, 23.28)** | 2.69 (2.05, 3.53) | 21.56 (19.76, 23.48) | 2.68 (2.04, 3.51) |
| **Fishing** | **50.33 (46.09, 54.58)** | 2.08 (1.16, 3.68) | 50.57 (46.32, 54.80) | 2.08 (1.16, 3.68) |
| **Female** | **30.82 (28.29, 33.46)** | 2.30 (1.59, 3.30) | 30.84 (28.32, 33.49) | 2.30 (1.59, 3.30) |
| **Male** | **24.95 (22.56, 27.49)** | 2.80 (2.00, 3.90) | 25.00 (22.61, 27.55) | 2.80 (2.00, 3.90) |
| **55+** | **Overall** | 17.61 (15.19, 20.32) | 5.74 (4.38, 7.50) | 17.63 (15.21, 20.33) | 5.88 (4.48, 7.66) |
| **Inland** | **15.45 (13.08, 18.16)** | 5.73 (4.32, 7.57) | 15.43 (13.07, 18.13) | 5.87 (4.43, 7.74) |
| **Fishing** | **43.33 (32.11, 55.28)** | 5.84 (2.29, 14.12) | 43.28 (32.10, 55.19) | 5.97 (2.35, 14.37) |
| **Female** | 17.51 (14.48, 21.01) | 7.13 (5.22, 9.67) | 17.53 (14.50, 21.04) | 7.13 (5.22, 9.67) |
| **Male** | 17.74 (14.01, 22.20) | 3.92 (2.30, 6.58) | 17.77 (14.03, 22.24) | 3.92 (2.30, 6.58) |
| **Total** | **Overall** | 16.90 (16.36, 17.44) | 0.92 (0.79, 1.07) | 18.19 (17.63, 18.76) | 0.99 (0.86, 1.15) |
| **Inland** | **11.25 (10.74, 11.78)** | 0.94 (0.80, 1.12) | 12.24 (11.70, 12.81) | 1.02 (0.86, 1.20) |
| **Fishing** | **33.55 (32.20, 34.93)** | 0.86 (0.63, 1.16) | 35.42 (34.05, 36.83) | 0.92 (0.68, 1.25) |
| **Female** | **20.57 (19.78, 21.39)** | **1.14 (0.95, 1.38)** | 21.39 (20.58, 22.23) | 1.18 (0.98, 1.41) |
| **Male** | **13.21 (12.51, 13.93)** | **0.70 (0.55, 0.89)** | 14.47 (13.72, 15.25) | 0.78 (0.61, 0.99) |

Notes: Prevalence estimates were weighted for sampling bias on age, sex, and community type, using inverse probability weights and the confidence intervals for weighted and unweighted prevalence were based on Wilson score intervals.

**Supplement Table 3*.* Weighted and Unweighted Prevalence of Diagnosed Diabetes by HIV Serostatus, Age, Community Type, and Sex.**

| **Age group** | **Stratum** | **Weighted Diabetes Prevalence** | | **Unweighted Diabetes Prevalence** | |
| --- | --- | --- | --- | --- | --- |
| **HIV Negative** | **HIV Positive** | **HIV Negative** | **HIV Positive** |
| **15-34** | **Overall** | 0.16% (0.05%, 0.54%) | 0.51% (0.23%, 1.13%) | 0.17% (0.10%, 0.27%) | 0.54% (0.25%, 1.16%) |
| **Inland** | 0.12% (0.02%, 0.61%) | 0.00% (0.00%, 0.50%) | 0.13% (0.07%, 0.24%) | 0.00% (0.00%, 0.78%) |
| **Fishing** | 0.30% (0.13%, 0.67%) | 0.90% (0.41%, 1.99%) | 0.31% (0.14%, 0.68%) | 0.95% (0.44%, 2.06%) |
| **Female** | 0.24% (0.10%, 0.54%) | 0.72% (0.33%, 1.60%) | 0.24% (0.13%, 0.43%) | 0.73% (0.33%, 1.58%) |
| **Male** | 0.09% (0.01%, 0.80%) | 0.00% (0.00%, 0.50%) | 0.09% (0.03%, 0.23%) | 0.00% (0.00%, 1.27%) |
| **35-44** | **Overall** | **1.29% (0.94%, 1.76%)** | **0.37% (0.16%, 0.89%)** | 1.31% (0.96%, 1.78%) | 0.39% (0.17%, 0.91%) |
| **Inland** | 1.13% (0.77%, 1.65%) | 0.48% (0.16%, 1.49%) | 1.14% (0.78%, 1.66%) | 0.50% (0.17%, 1.46%) |
| **Fishing** | 1.80% (1.05%, 3.08%) | 0.28% (0.07%, 1.10%) | 1.85% (1.08%, 3.13%) | 0.29% (0.08%, 1.06%) |
| **Female** | 1.58% (1.07%, 2.33%) | 0.67% (0.28%, 1.60%) | 1.58% (1.08%, 2.33%) | 0.67% (0.29%, 1.56%) |
| **Male** | **0.99% (0.59%, 1.67%)** | **0.00% (0.00%, 0.50%)** | 0.99% (0.59%, 1.66%) | 0.00% (0.00%, 0.71%) |
| **45-54** | **Overall** | 2.68% (2.01%, 3.56%) | 2.23% (1.35%, 3.66%) | 2.66% (2.00%, 3.53%) | 2.24% (1.36%, 3.66%) |
| **Inland** | 2.81% (2.08%, 3.80%) | 2.25% (1.17%, 4.27%) | 2.80% (2.07%, 3.77%) | 2.23% (1.18%, 4.19%) |
| **Fishing** | 1.96% (0.82%, 4.62%) | 2.19% (0.99%, 4.80%) | 1.91% (0.82%, 4.39%) | 2.24% (1.03%, 4.80%) |
| **Female** | 2.26% (1.44%, 3.51%) | 2.39% (1.25%, 4.53%) | 2.25% (1.45%, 3.49%) | 2.39% (1.26%, 4.49%) |
| **Male** | 3.05% (2.10%, 4.41%) | 2.04% (0.92%, 4.46%) | 3.05% (2.11%, 4.40%) | 2.03% (0.94%, 4.37%) |
| **55+** | **Overall** | 6.25% (4.69%, 8.28%) | 3.35% (1.40%, 7.81%) | 6.42% (4.83%, 8.48%) | 3.33% (1.43%, 7.57%) |
| **Inland** | 6.02% (4.46%, 8.09%) | 4.13% (1.73%, 9.58%) | 6.18% (4.59%, 8.28%) | 4.13% (1.78%, 9.31%) |
| **Fishing** | **10.31% (3.91%, 24.53%)** | **0.00% (0.00%, 0.50%)** | 10.53% (4.17%, 24.13%) | 0.00% (0.00%, 11.70%) |
| **Female** | 7.94% (5.73%, 10.91%) | 3.31% (1.07%, 9.75%) | 7.94% (5.74%, 10.90%) | 3.30% (1.13%, 9.25%) |
| **Male** | 4.03% (2.24%, 7.12%) | 3.40% (0.85%, 12.60%) | 4.03% (2.26%, 7.07%) | 3.39% (0.93%, 11.54%) |
| **Total** | **Overall** | 0.92% (0.74%, 1.14%) | 0.93% (0.65%, 1.32%) | 1.00% (0.85%, 1.18%) | 0.96% (0.68%, 1.36%) |
| **Inland** | 0.93% (0.76%, 1.15%) | 1.03% (0.64%, 1.66%) | 1.01% (0.85%, 1.21%) | 1.05% (0.66%, 1.68%) |
| **Fishing** | 0.87% (0.60%, 1.26%) | 0.83% (0.49%, 1.39%) | 0.95% (0.66%, 1.38%) | 0.87% (0.52%, 1.46%) |
| **Female** | 1.15% (0.94%, 1.42%) | 1.11% (0.73%, 1.66%) | 1.19% (0.97%, 1.46%) | 1.13% (0.75%, 1.69%) |
| **Male** | 0.71% (0.53%, 0.93%) | 0.65% (0.32%, 1.30%) | 0.80% (0.62%, 1.03%) | 0.67% (0.34%, 1.32%) |

Notes: Prevalence estimates were weighted for sampling bias on age, sex, and community type, using inverse probability weights and the weighted confidence intervals were estimated with logit transformation to ensure prevalence estimates stay within the [0,100%] range for rare events. The confidence intervals for unweighted prevalence were based on Wilson score intervals.
